# Supplementary material for: Enhancing thermoelectric properties of a p-type Mg3Sb2- based Zintl phase compound by Pb substitution in the anionic framework
Source: Royal Society of Chemistry journal article supplement (doi:10.1039/c4ra04889j), 2014-01-01
Supplement: c4ra04889j1.pdf [file c4ra04889j1.pdf]

# Supporting Informations:

Manuscript ID RA-ART-05-2014-004889. R1 entitled “Enhancing Thermoelectric Properties of p-type  $\text{Mg}_3\text{Sb}_2$  - based Zintl Phase Compound by Pb Substitution in the Anionic Framework.

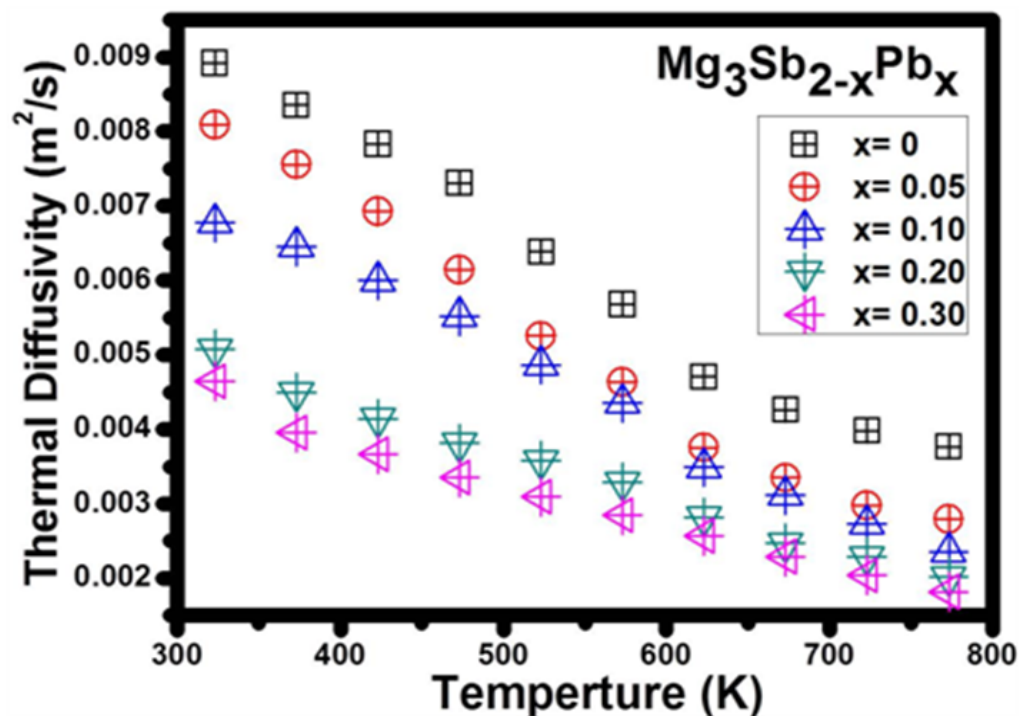

**Figure S1**

Figure S1: Temperature dependence of thermal diffusivity of  $\text{Mg}_3\text{Sb}_{2-x}\text{Pb}_x$  ( $0 \leq x \leq 0.3$ ).

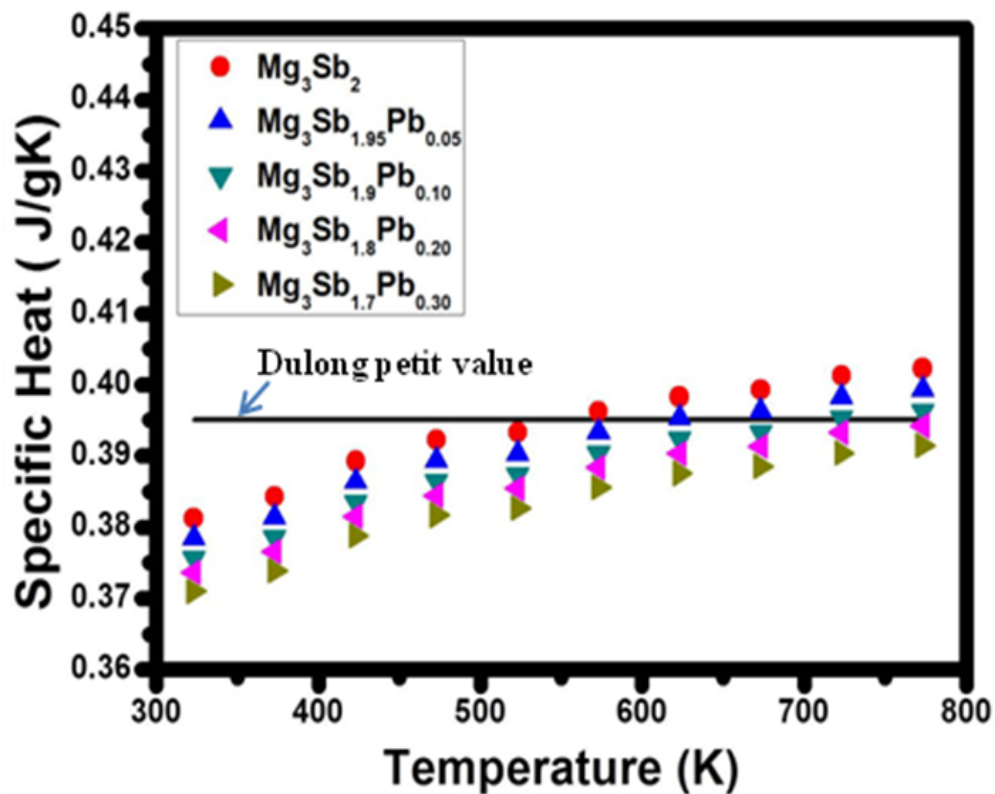

**Figure S2**

Figure S2: Temperature dependent value of specific heat ( $C_p$ ) of  $\text{Mg}_3\text{Sb}_{2-x}\text{Pb}_x$  ( $0 \leq x \leq 0.3$ ) samples with Dulong–Petit specific heat at constant volume.

**Table T1.** Density of all the samples with composition  $\text{Mg}_3\text{Sb}_{2-x}\text{Pb}_x$  ( $0 \leq x \leq 0.3$ ).

| Compositions                       | $\text{Mg}_3\text{Sb}_2$ | $\text{Mg}_3\text{Sb}_{1.95}\text{Pb}_{0.05}$ | $\text{Mg}_3\text{Sb}_{1.9}\text{Pb}_{0.1}$ | $\text{Mg}_3\text{Sb}_{1.8}\text{Pb}_{0.2}$ | $\text{Mg}_3\text{Sb}_{1.7}\text{Pb}_{0.3}$ |
|------------------------------------|--------------------------|-----------------------------------------------|---------------------------------------------|---------------------------------------------|---------------------------------------------|
| Density ( $\text{g}/\text{cm}^3$ ) | 3.94                     | 3.87                                          | 3.95                                        | 3.85                                        | 3.89                                        |

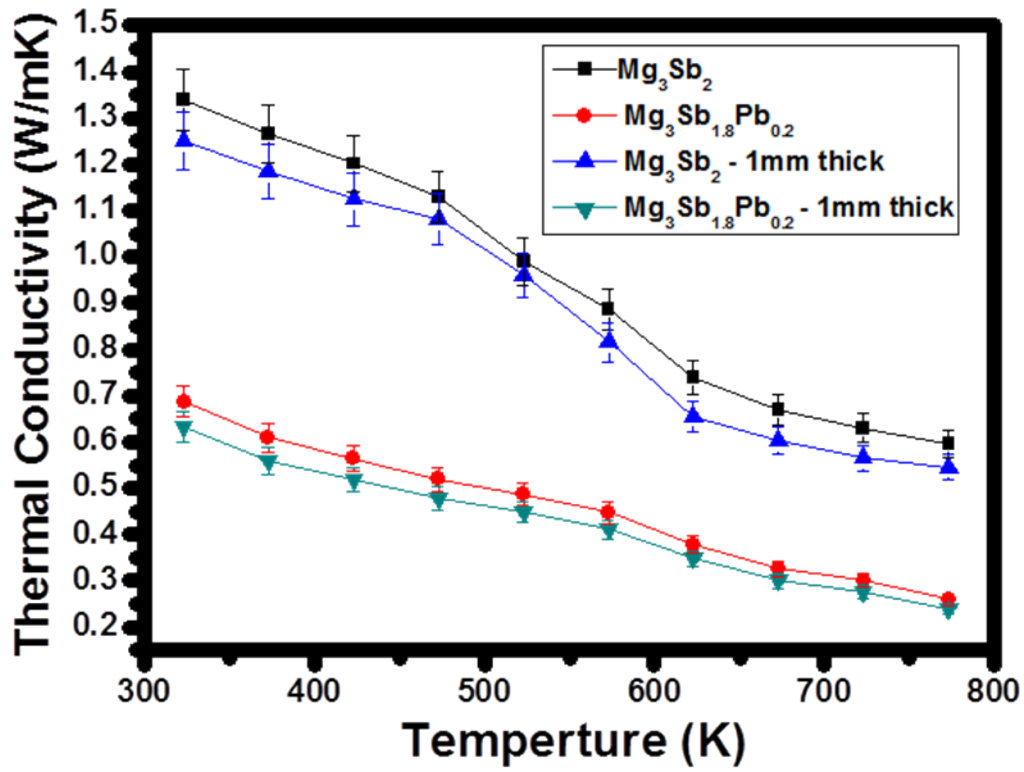

**Figure S3**

Figure S3: Comparison of temperature dependence of total thermal conductivity of  $\text{Mg}_3\text{Sb}_2$  and  $\text{Mg}_3\text{Sb}_{1.8}\text{Pb}_{0.2}$  measured on different thickness of 2.5 mm and 1.0 mm respectively.
